# Supplementary material
Source: PubMed Central journal article supplement (PMC10114713)
Supplement: bg1c00048_si_001.pdf [file bg1c00048_si_001.pdf]

## Supplementary Information

### **RadicalSAM.org: A Resource to Interpret Sequence-Function Space and Discover New Radical SAM Enzyme Chemistry**

Nils Oberg<sup>1</sup>, Timothy W. Precord<sup>1,2</sup>, Douglas A. Mitchell<sup>1-3\*</sup>, and John A. Gerlt<sup>1,2,4\*</sup>

<sup>1</sup>Carl R. Woese Institute for Genomic Biology, <sup>2</sup>Department of Chemistry, <sup>3</sup>Department of Microbiology, and <sup>4</sup>Department of Biochemistry, University of Illinois at Urbana-Champaign, 1206 West Gregory Drive, Urbana, Illinois 61801, United States.

**Table S1.** The list of Pfam families and InterPro families/domains used to identify members of the RSS in UniProt Release 2020\_05 and InterPro Release 82 in the release of RadicalSAM.org described in this Perspective is provided on the “Sequence Families” subtab of the “Current Release” tab on Home page of RadicalSAM.org. In recent unpublished updates of the RSS, the Pfam families and InterPro families/domains in this table were added to the list to provide a more complete inventory of the members of the RSS.

| <b>Identifier</b> | <b>Short Name</b>        | <b>Identifier</b> | <b>Short Name</b>  |
|-------------------|--------------------------|-------------------|--------------------|
| IPR017672         | MA_4551-like             | IPR027626         | Pseudo_SAM_Halo    |
| IPR023805         | Uncharacterised_Spl-rel  | IPR030894         | Ahb_Proteobacteria |
| IPR023807         | Peptide_mod_rSAM         | IPR030950         | rSAM_PoyD          |
| IPR023820         | rSAM_GDL-assoc           | IPR031004         | rSAM_YfkAB         |
| IPR023858         | RSAM_HmdB                | IPR031010         | rSAM_mob_pairA     |
| IPR023862         | CHP03960_rSAM            | IPR031014         | rSAM_BlsE          |
| IPR023863         | rSAM_PTO1314             | IPR031019         | rSAM_vs_C_rich     |
| IPR023867         | Sulphatase_maturase_rSAM | IPR034519         | TunB-like          |
| IPR023874         | DNA_rSAM_put             | IPR034532         | OxsB-like          |
| IPR023984         | rSAM_ocin_1              | IPR040087         | MJ0021-like        |
| IPR024021         | FeFe-hyd_HydE_rSAM       | IPR040088         | MJ0103-like        |
| IPR024032         | rSAM_paired_HxsC         | IPR041582         | RimO_TRAM          |
| IPR026351         | rSAM_SeCys               | PF04055           | Radical_SAM        |
| IPR026401         | CXXX_matur               | PF08497           | Radical_SAM_N      |
| IPR027559         | B12_rSAM_oligo           | PF12345           | DUF3641            |
| IPR027622         | rSAM_Clo7bot             |                   |                    |

## Expanded images for seven text figures.

**Figure S2.** The SSN generated with a maximum e-value edge threshold of  $1e-20$  used by the SFLD to identify its 20 functionally characterized subgroups (colored/numbered clusters) and 22 uncharacterized subgroups. Large nodes represent experimentally characterized proteins; downward arrows indicate a structurally characterized protein; diamonds indicate no structural characterization. Reproduced with permission from reference 9; <http://www.elsevier.com>.

**Figure S7.** A representative Explore page: Megacluster-3-1, 7-carboxy-7-deazaguanine synthase-like, SFLD subgroup 1.

**Figure S9.** A representative GND Viewer page: Cluster-6 in the “diced” SSN for Megacluster-1-1 generated with a minimum edge alignment score threshold of 60.

**Figure S12A.** Navigation through diced megaclusters. “Previous” and “Next” navigation buttons (green arrows) direct the cluster selection backward and forward, respectively, in the selected diced SSN.

**Figure S12B.** Navigation through diced megaclusters. “Cluster” drop down menu allows the user to select any cluster in the currently viewed diced SSN.

**Figure S12C.** Navigation through diced megaclusters. Alignment score drop down menu allows the user to view the cluster in the selected diced SSN.

**Figure S13.** AS Walk-Through pop-up window showing identity of the progenitor cluster (“Previous Cluster”) and progeny clusters (“Next Clusters”).

**Figure S14.** Search functions: “Find by UniProt ID” identifies the cluster(s) containing the user-specified accession ID; “Find by Sequence” identifies the cluster(s) with the best HMM match to the user-specified sequence; “GND Lookup” provides the GND(s) for the user-specified UniProt

ID(s); “Find by Taxonomy” provides a list of the UniProt accession IDs and their clusters for the user-specified genus/species.

**Figure S15.** The Submit page for community submission of enzymatic activities and metabolic functions.

**Figure S16.** Contact page form for submitting feedback or questions.

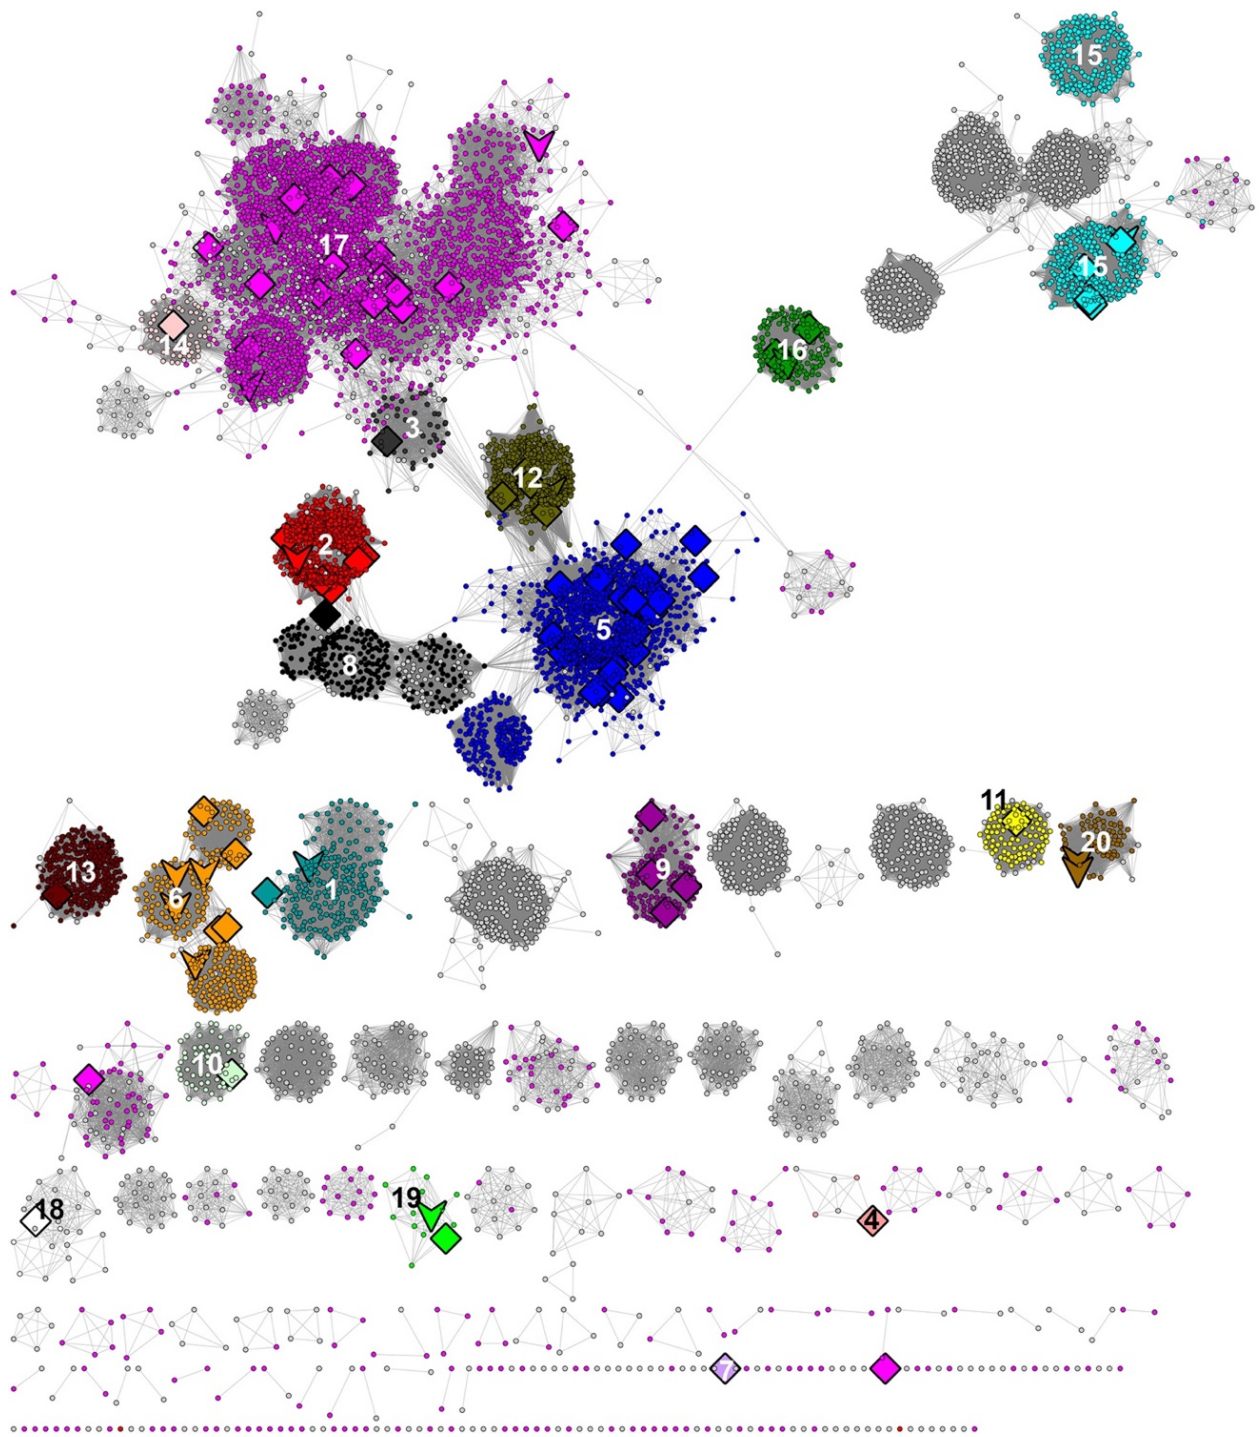

**Figure 2.** The SSN generated with a maximum e-value edge threshold of  $1e-20$  used by the SFLD to identify its 20 functionally characterized subgroups (colored/numbered clusters) and 22 uncharacterized subgroups. Large nodes represent experimentally characterized proteins: downward arrows indicate a structurally characterized protein; diamonds indicate no structural characterization. Reproduced with permission from reference 9. Copyright 2018 Elsevier.

# Exploring the Radical SAM Superfamily

Explore > Mega-3 > Megacluster-3-1

## Megacluster-3-1: 7-carboxy-7-deazaguanine synthase-like [1]

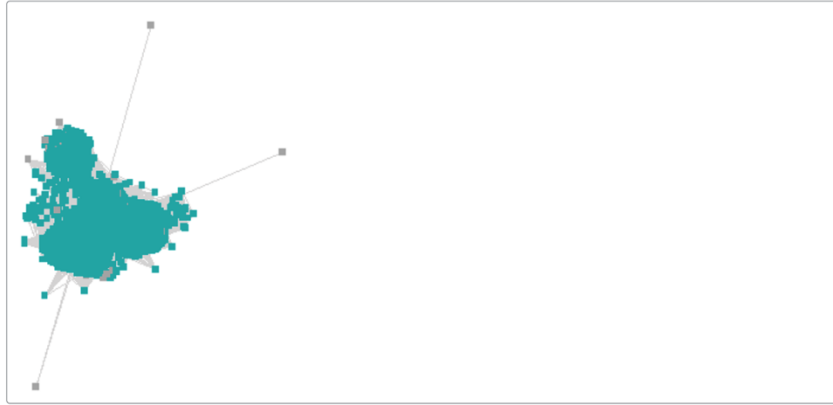

[SWISS-PROT](#)
[KEGG](#)
[PDB](#)
[TIGR](#)
[PUBS](#)
[ANNO](#)
[TAXONOMY](#)
[GENOME NEIGHBORHOOD DIAGRAM](#)

[PNG](#)

NUMBER OF IDS: UNIPROT: **23,317**, UNIREF90: **9,627**

CONVERGENCE RATIO: **0.214**    SSN CONVERGENCE RATIO: **0.304**

CONSERVED CYS RESIDUES:    **3**   **3**   **3**   **3**   **3**   **3**   **5**   **5**   **12**  
                                   90% 80% 70% 60% 50% 40% 30% 20% 10%

### WebLogo

[PNG](#)

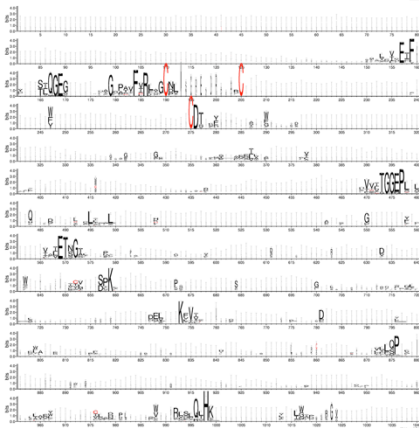

### Length Histogram for All Sequences

[PNG](#)

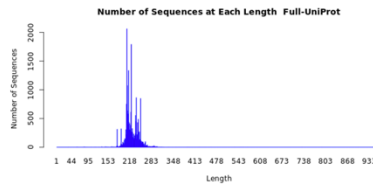

### Length Histogram for Node Sequences (UniRef90) — Used for MSA, WebLogo, and HMM

[PNG](#)

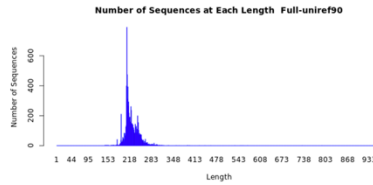

### Downloads

| Download                        | File Type                                      |
|---------------------------------|------------------------------------------------|
| <a href="#">Download</a>        | Sequence Similarity Network                    |
| <a href="#">Download</a>        | WebLogo for Node Sequences                     |
| <a href="#">Download</a>        | MSA for Node Sequences                         |
| <a href="#">Download</a>        | HMM for Node Sequences                         |
| <a href="#">View HMM</a>        | View HMM in SkyLign                            |
| <b>ID Lists and FASTA Files</b> |                                                |
| <a href="#">Download</a>        | UniProt ID List                                |
| <a href="#">Download</a>        | UniRef90 ID list                               |
| <a href="#">Download</a>        | UniProt FASTA file                             |
| <a href="#">Download</a>        | UniRef90 FASTA file                            |
| <b>Consensus Residues</b>       |                                                |
| <a href="#">Download</a>        | Consensus residue percentage summary table (C) |

**Figure 7.** Example of an Explore page. Shown is Megacluster-3-1: 7-carboxy-7-deazaguanine synthase-like (SFLD subgroup 1).

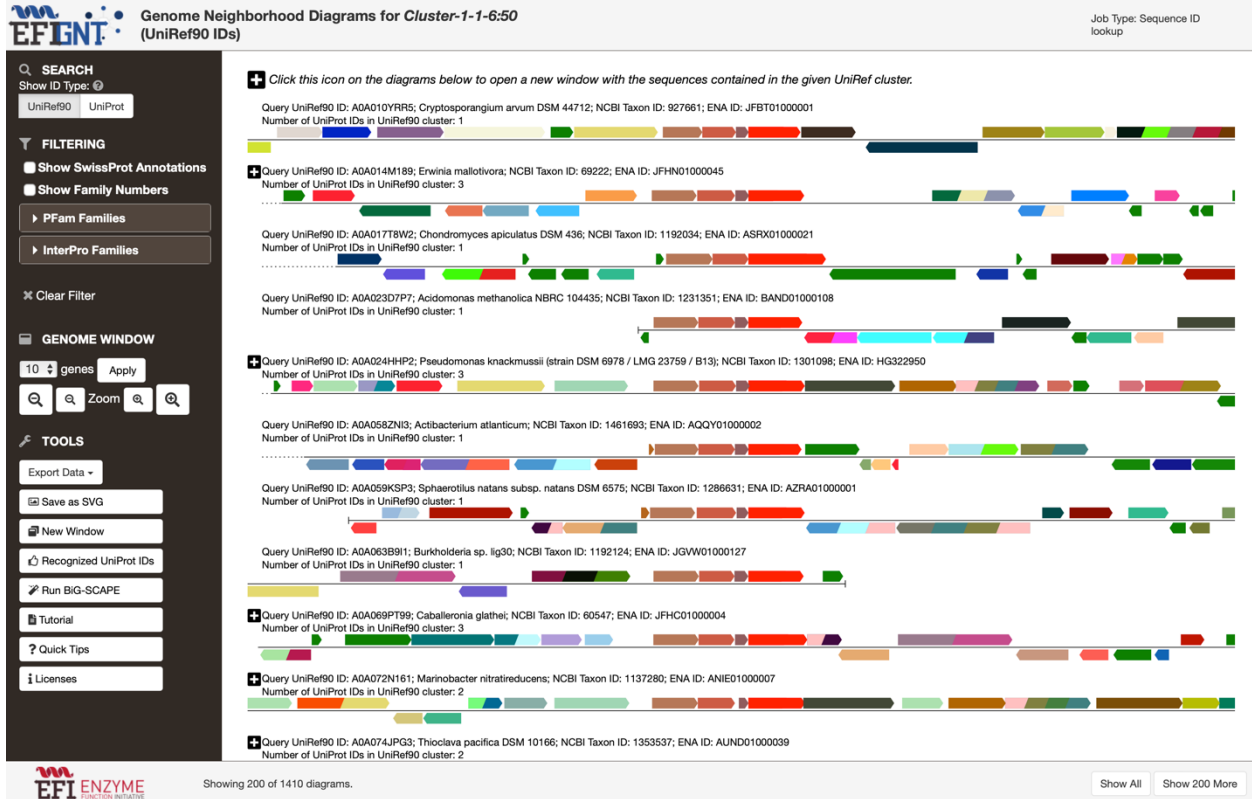

**Figure 9.** A representative GND Viewer page: Cluster-6 in the “diced” SSN for Megacluster-1-1 generated using an alignment score of 60.



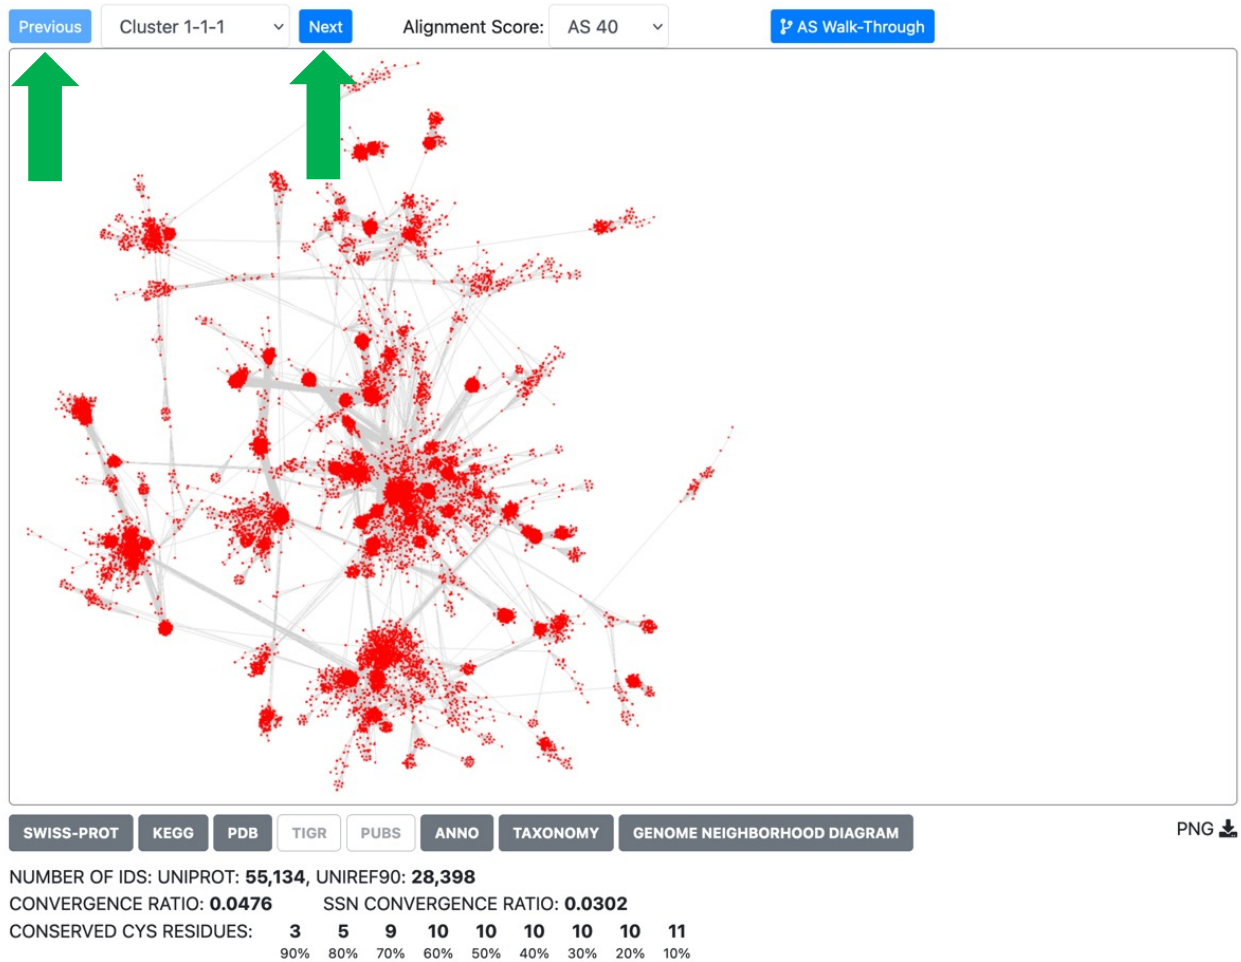

**Figure 12A.** Navigation through diced megaclusters. “Previous” and “Next” navigation buttons (green arrows) direct the cluster selection backward and forward, respectively, in the selected diced SSN.

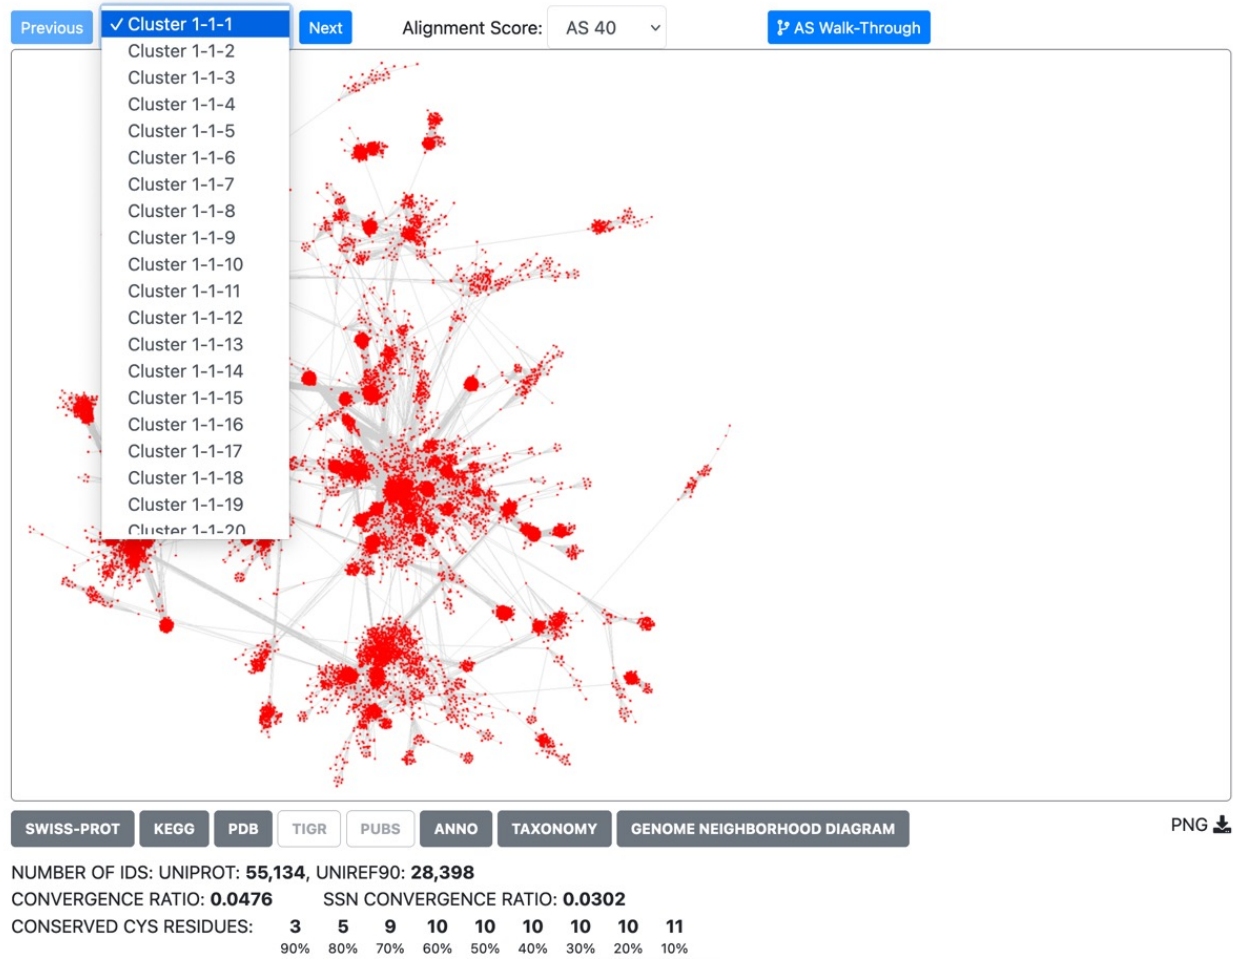

**Figure 12B.** Navigation through diced megaclusters. “Cluster” drop down menu allows the user to select any cluster in the currently viewed diced SSN.

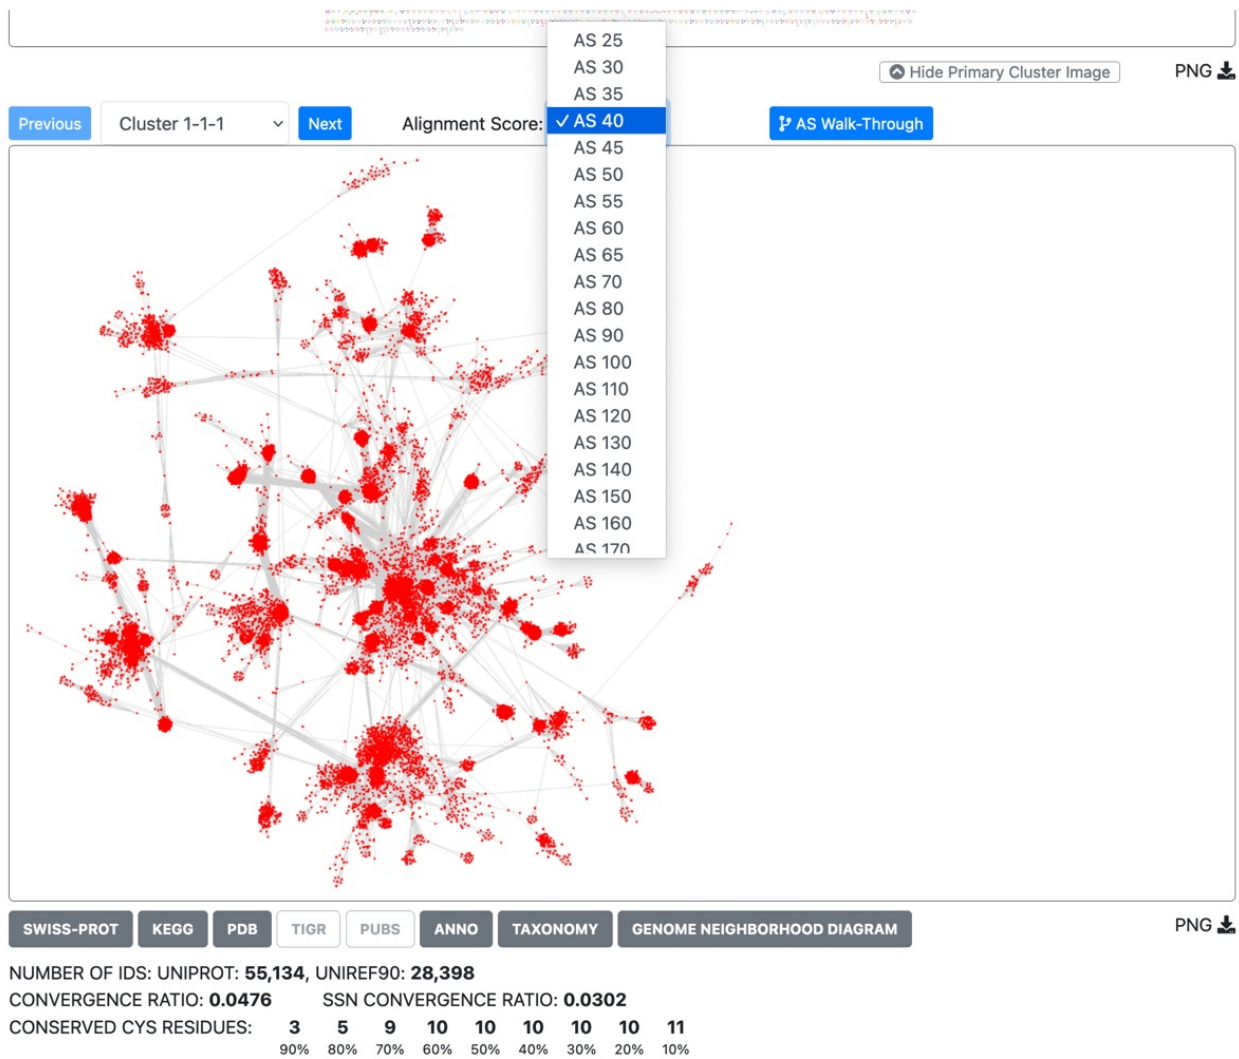

**Figure 12C.** Navigation through diced megaclusters. Alignment score drop down menu allows the user to view the cluster in the selected diced SSN.

## Alignment Score Walk-Through

| Cluster ID                     | Num Nodes | Conv. Ratio | SwissProt                                                                                                                                                                                                                                                                                                                                                                                                                                                                                                                                                                                                                                                                                                                                                                                                                                                                                                                                          | Annotation                                                                                                                                                                                                                                                                                                                                                                                                                                                                                                                                                                                                                                               |
|--------------------------------|-----------|-------------|----------------------------------------------------------------------------------------------------------------------------------------------------------------------------------------------------------------------------------------------------------------------------------------------------------------------------------------------------------------------------------------------------------------------------------------------------------------------------------------------------------------------------------------------------------------------------------------------------------------------------------------------------------------------------------------------------------------------------------------------------------------------------------------------------------------------------------------------------------------------------------------------------------------------------------------------------|----------------------------------------------------------------------------------------------------------------------------------------------------------------------------------------------------------------------------------------------------------------------------------------------------------------------------------------------------------------------------------------------------------------------------------------------------------------------------------------------------------------------------------------------------------------------------------------------------------------------------------------------------------|
| <b>Previous Cluster (AS35)</b> |           |             |                                                                                                                                                                                                                                                                                                                                                                                                                                                                                                                                                                                                                                                                                                                                                                                                                                                                                                                                                    |                                                                                                                                                                                                                                                                                                                                                                                                                                                                                                                                                                                                                                                          |
| <a href="#">Cluster-1-1-1</a>  | 34396     | 0.0383      | <ul style="list-style-type: none"> <li>+ AdoMet-dependent heme synthase</li> <li>+ Anaerobic sulfatase-maturing enzyme ShortAnSME</li> <li>+ Anaerobic sulfatase-maturing enzyme homolog AsIB ShortAnSME homolog</li> <li>+ Anaerobic sulfatase-maturing enzyme homolog YdeM ShortAnSME homolog</li> <li>+ Antilisterial bacteriocin subtilosin biosynthesis protein Alba</li> <li>+ Fe-coproporphyrin III synthase</li> <li>+ PqqA peptide cyclase</li> <li>+ Putative mycofactocin radical SAM maturase MftC</li> <li>+ S-adenosyl-L-methionine-dependent 2-deoxy-scylo-inosamine dehydrogenase</li> <li>+ Sporulation killing factor maturation protein SkfB</li> <li>+ Tungsten-containing aldehyde ferredoxin oxidoreductase cofactor-modifying protein</li> <li>+ Uncharacterized protein AF_2204</li> <li>+ Uncharacterized protein MJ0907</li> <li>+ Uncharacterized protein MTH_114</li> <li>+ Uncharacterized protein sll1766</li> </ul> | <ul style="list-style-type: none"> <li>+ A0A0E3RYH2</li> <li>+ A0A1H7F4G6</li> <li>+ A0A1I5E523</li> <li>+ A0A378Y5A1</li> <li>+ A0PM49</li> <li>+ A1B2Q7</li> <li>+ A3DDW1</li> <li>+ A4VXX3</li> <li>+ B8J367</li> <li>+ C2TQ82</li> <li>+ C3HC15</li> <li>+ C3HC16</li> <li>+ D0QZJ5</li> <li>+ F5AT08</li> <li>+ F5AT09</li> <li>+ G0LD12</li> <li>+ G0LD27</li> <li>+ O31423</li> <li>+ P27507</li> <li>+ P71011</li> <li>+ P71517</li> <li>+ P9WJ78</li> <li>+ P9WJ79</li> <li>+ Q0TTH1</li> <li>+ Q46CH7</li> <li>+ Q51741</li> <li>+ Q841K9</li> <li>+ Q8DT69</li> <li>+ Q8G907</li> <li>+ Q8R6P9</li> <li>+ Q8RAM6</li> <li>+ Q9X758</li> </ul> |
| <b>Next Clusters (AS45)</b>    |           |             |                                                                                                                                                                                                                                                                                                                                                                                                                                                                                                                                                                                                                                                                                                                                                                                                                                                                                                                                                    |                                                                                                                                                                                                                                                                                                                                                                                                                                                                                                                                                                                                                                                          |
| <a href="#">Cluster-1-1-1</a>  | 10995     | 0.0918      | <ul style="list-style-type: none"> <li>+ AdoMet-dependent heme synthase</li> <li>+ Fe-coproporphyrin III synthase</li> <li>+ Putative mycofactocin radical SAM maturase MftC</li> </ul>                                                                                                                                                                                                                                                                                                                                                                                                                                                                                                                                                                                                                                                                                                                                                            | <ul style="list-style-type: none"> <li>+ A0A1I5E523</li> <li>+ A0PM49</li> <li>+ B8J367</li> <li>+ P9WJ78</li> <li>+ P9WJ79</li> <li>+ Q46CH7</li> <li>+ Q8DT69</li> </ul>                                                                                                                                                                                                                                                                                                                                                                                                                                                                               |
| <a href="#">Cluster-1-1-2</a>  | 3728      | 0.464       | <ul style="list-style-type: none"> <li>+ Anaerobic sulfatase-maturing enzyme ShortAnSME</li> <li>+ Anaerobic sulfatase-maturing enzyme homolog AsIB ShortAnSME homolog</li> <li>+ Anaerobic sulfatase-maturing enzyme homolog YdeM ShortAnSME homolog</li> <li>+ Uncharacterized protein MTH_114</li> <li>+ Uncharacterized protein sll1766</li> </ul>                                                                                                                                                                                                                                                                                                                                                                                                                                                                                                                                                                                             | <ul style="list-style-type: none"> <li>+ A0A0E3RYH2</li> <li>+ A0A1H7F4G6</li> <li>+ Q0TTH1</li> <li>+ Q9X758</li> </ul>                                                                                                                                                                                                                                                                                                                                                                                                                                                                                                                                 |

Alignment Score Walk-Through

1

|                 |      |        |                                                                                     |                                                                                                  |
|-----------------|------|--------|-------------------------------------------------------------------------------------|--------------------------------------------------------------------------------------------------|
| Cluster-1-1-3   | 2674 | 0.0638 |                                                                                     |                                                                                                  |
| Cluster-1-1-4   | 2429 | 0.326  |                                                                                     | + A0A378Y5A1<br>+ A1B2Q7<br>+ A3DDW1<br>+ C3HC15<br>+ F5AT08<br>+ GOLD12<br>+ GOLD27<br>+ Q8RAM6 |
| Cluster-1-1-6   | 1610 | 0.993  | + PqqA peptide cyclase                                                              | + P27507<br>+ P71517                                                                             |
| Cluster-1-1-8   | 1323 | 0.101  |                                                                                     | + Q8R6P9                                                                                         |
| Cluster-1-1-9   | 1136 | 0.139  |                                                                                     |                                                                                                  |
| Cluster-1-1-15  | 625  | 0.663  |                                                                                     |                                                                                                  |
| Cluster-1-1-17  | 474  | 0.702  |                                                                                     |                                                                                                  |
| Cluster-1-1-20  | 429  | 0.352  | + Tungsten-containing aldehyde ferredoxin oxidoreductase cofactor-modifying protein | + Q51741                                                                                         |
| Cluster-1-1-21  | 419  | 0.152  |                                                                                     |                                                                                                  |
| Cluster-1-1-26  | 267  | 0.206  |                                                                                     |                                                                                                  |
| Cluster-1-1-32  | 176  | 0.406  |                                                                                     |                                                                                                  |
| Cluster-1-1-36  | 129  | 0.27   | + Uncharacterized protein MJ0907                                                    |                                                                                                  |
| Cluster-1-1-38  | 128  | 0.192  |                                                                                     |                                                                                                  |
| Cluster-1-1-46  | 107  | 0.71   |                                                                                     |                                                                                                  |
| Cluster-1-1-50  | 103  | 0.994  |                                                                                     |                                                                                                  |
| Cluster-1-1-61  | 88   | 0.31   | + Antilisterial bacteriocin subtilisin biosynthesis protein Alba                    | + A4VXX3<br>+ D0QZJ5<br>+ P71011                                                                 |
| Cluster-1-1-64  | 77   | 0.524  |                                                                                     |                                                                                                  |
| Cluster-1-1-68  | 73   | 0.493  |                                                                                     |                                                                                                  |
| Cluster-1-1-81  | 62   | 0.401  |                                                                                     |                                                                                                  |
| Cluster-1-1-105 | 47   | 0.229  |                                                                                     |                                                                                                  |
| Cluster-1-1-113 | 42   | 0.321  |                                                                                     |                                                                                                  |
| Cluster-1-1-117 | 41   | 0.0734 |                                                                                     |                                                                                                  |

**Figure 13.** AS Walk-Through pop-up window showing identity of the progenitor cluster (“Previous Cluster”) and progeny clusters (“Next Clusters”).

# Search

## Find by UniProt ID

Input a UniProt ID to identify its cluster.

For all but Megacluster-1-1 (SFLD Subgroup-17, SPASM/Twitch domain), Megacluster-2-1 (SFLD Subgroup 5, B12-binding domain), Megacluster-2-2 (SFLD Subgroup 2, anaerobic coproporphyrinogen-III oxidase-like), or Cluster-7 ((SFLD Subgroup 16, PLP-dependent), the search opens the Explore page for the cluster that contains the user-specified UniProt ID.

For Megacluster-1-1 (SFLD Subgroup-17, SPASM/Twitch domain), Megacluster-2-1 (SFLD Subgroup 5, B12-binding domain), Megacluster-2-2 (SFLD Subgroup 2, anaerobic coproporphyrinogen-III oxidase-like), or Cluster-7 ((SFLD Subgroup 16, PLP-dependent), the search identifies the cluster (if  $\geq 3$  nodes/UniRef50 IDs) in each "diced" SSN that contains the ID. The number of UniProt IDs, number of cluster nodes, and UniProt ID convergence ratio (CR; described on the Subgroups tab) are provided for each identified cluster.

In the generation of the megaclusters and clusters, some UniProt IDs for a singleton may be deleted. The Search will report: "ID not found".

Find Cluster

## Find by Sequence

Input a sequence to find clusters that contain homologues. The sequence is used to query the HMMs for the clusters ( $\geq 3$  UniRef IDs/nodes).

The results reports matches for the "top" three clusters if the e-value is  $\leq 1e-10$ . The cluster is a link to the Explore page for the cluster.

For Megacluster-1-1 (SFLD Subgroup-17, SPASM/Twitch domain), Megacluster-2-1 (SFLD Subgroup 5, B12-binding domain), Megacluster-2-2 (SFLD Subgroup 2, anaerobic coproporphyrinogen-III oxidase-like), or Cluster-7 ((SFLD Subgroup 16, PLP-dependent), the second section reports matches for clusters in the "diced" SSNs; the clusters with the three smallest e-values are listed. The number of UniProt IDs, number of cluster nodes, and UniProt ID convergence ratio (CR; described on the Subgroups tab) are provided for each identified cluster.

The "Exploring Subgroups" subtab under the "Functionally Diverse Subgroups" tab provides advice about interpreting the search results for these subgroups.

Find Clusters

## GND Lookup

The [EFI-GNT web tools](#) allow users to lookup genome neighborhood diagrams (GNDs) for lists of UniProt IDs. Users may find it convenient to be able to access the GNDs for members of the RSS within RadicalSAM.org.

The GND Viewer can be accessed with the button below. The input is a list of UniProt IDs. The GNDs will be displayed.

GND Viewer

## Find by Taxonomy

Input the genus/species/strain for an organism.

If only the genus is entered, a pop-up list of matching genus-species-strains is provided for selection of the desired genus/species/strain. If the genus and species are entered, a pop-up list of matching genus-species-strains is provided for selection of the desired genus/species/strain.

The search provides a list of sequences in the RSS. The list provides the UniProt ID (link to the UniProt page for sequence), UniProt description, organism name, UniProt annotation status (SwissProt or TrEMBL), and link to its Explore page.

Find Sequences

**Figure 14.** Search functions: “Find by UniProt ID” identifies the cluster(s) containing a user-specified UniProt ID. “Find by Sequence” identifies the cluster(s) with the best HMM match to a user-specified sequence. “GND Lookup” provides the GND(s) for the user-specified UniProt ID(s). “Find by Taxonomy” provides a list of the UniProt IDs and their clusters for the user-specified genus/species.

# Submit

We encourage user-submitted annotations for cluster or individual sequence. Upon review and approval, these annotation will be included on results pages for individual clusters.

## Your name

## Your email

Your email address will never be shared.

## Cluster ID

If you don't know this, then please provide details below.

## Function/Annotation

Provide the protein function that is associated with the described function.

## Accession ID

Enter the UniProt (preferred) or NCBI accession ID that is associated with your submission. If this is unknown, please provide details below.

## Sequence

Provide the protein sequence that is associated with the described function.

## Publication DOI

If the publicaion DOI is not available, provide a link to the publication, or provide details below.

## Details

Provide additional details regarding the sequence, cluster, publication, annotation, or other information.



**Figure 15.** The Submit page for community submission of enzymatic activities and metabolic functions.

# Send Feedback or Questions about RadicalSAM.org

Feedback, questions, or requests can be submitted to the team below.

Your name

Your email

Your email address will never be shared.

Your institution

Comments:

Fill in comments.

**Figure 16.** Contact page form for submitting feedback or questions.
